# Supplementary material for: Homeobox 27, a Homeodomain Transcription Factor, Confers Tolerances to CMV by Associating with Cucumber Mosaic Virus 2b Protein
Source: MDPI journal article supplement (doi:10.3390/pathogens11070788), 2022-07-12
Supplement: s1 [file s1]

### Supplementary Figure S1:

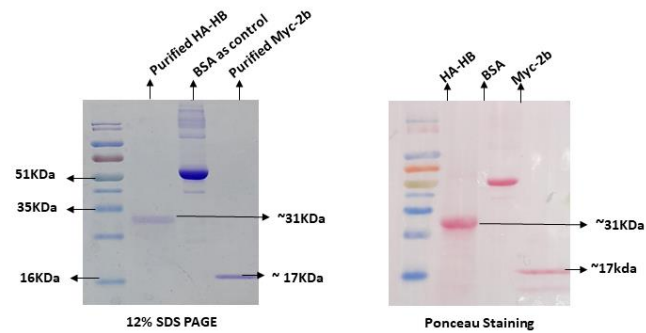

Far western blotting: Purified HB27-HA-pET28a and CMV2b-MYC-pET28a proteins were run along with BSA run on SDS-PAGE gel and stained with coomassie brilliant blue (a). the ponceau staining was done to ensure the transfer of proteins and consider as loading control (b).

### Supplementary Figure S2:

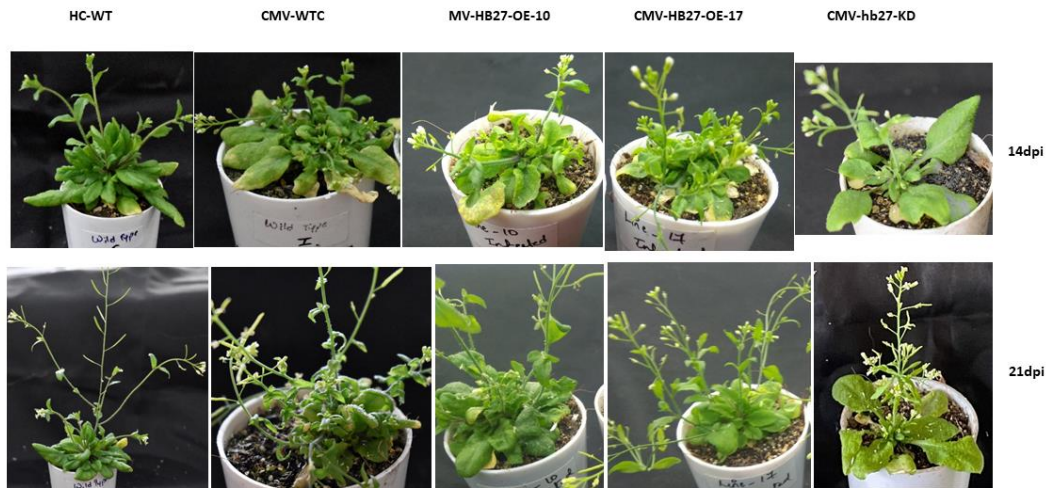

At 14 and 21 dpi, the symptoms of CMV on HB27-OE, hb27-KD, and wild type plants were compared to healthy wild type plants. When compared to HB27-KD and wild type plants, the severity of CMV infection in HB27-OE is lower.

**Table S1:** List of primers used in this study. Underlined sequences represent the restriction sites. Italicized sequences showed the HA and MYC tag sequences.

|                  |                                                                                                                              |
|------------------|------------------------------------------------------------------------------------------------------------------------------|
|                  | <b>Y2H construct</b>                                                                                                         |
| HB27             | FP 5' <u>AGATCT</u> ATGGATGAGATAAAACCAAA 3'<br>RP 5' <u>CTCGAGT</u> CATTCATCAATTATAATTT 3'                                   |
| CMV 2b           | FP 5' <u>CATATG</u> ATGGATGTGTTGA 3'<br>RP 5' <u>CCCGGGT</u> CAAAACGACCCTTC 3'                                               |
|                  | <b>BiFC construct</b>                                                                                                        |
| HB27             | FP 5' <u>CTCGAG</u> ATGGATGAGATAAAACCAAAAC 3'<br>RP 5' <u>ACTAGTTT</u> CATCAATTATAATTTTATCC 3'                               |
| 2b               | FP 5' <u>GGATCC</u> ATGGATGTGTTGACAGTAGTG 3'<br>RP 5' <u>CTCGAG</u> AAACGACCCTTCGGCCCATTCG 3'                                |
|                  | <b>Far western construct</b>                                                                                                 |
| HB27             | FP 5' GCAGCCATATG <u>TACCCATACGATGTTCCAGATTACGCT</u> GATGAGATAAAACCAAAG 3'<br>RP 5' TGGTGCTCGAGT <u>CATTCATCAATTATAAT</u> 3' |
| CMV 2b           | FP 5' <u>GGATCC</u> ATGGAACAAAACTCATCTCAGAAGAGGATCTGGATGTGTTGACAGTAG 3'<br>RP 5' TGGTGCTCGAGTTATCAAAACGACCCTTCG              |
|                  | <b>Overexpression construct</b>                                                                                              |
| HB27             | FP 5' AATAGATCTTATGGATGAGATAAAACCAAAG 3'<br>RP 5' TTAAGTAGTTTCATCAATTATAATTTTATCC 3'                                         |
| GFP              | FP 5' GGAGTTGTCCCAATTCTTGTT 3'<br>RP 5' GTCTCTCTTTTCGTTGGGATC 3'                                                             |
| Hygromycin       | FP 5' CATAACAAGCCAACCGGCCTCC 3'<br>RP 5' GCGTGGATATGTCCTGCGGGTA 3'                                                           |
|                  | <b>Mutant genotyping</b>                                                                                                     |
| HB27 full length | FP 5' ATGGATGAGATAAAACCAAAGAAAGAAG 3'<br>RP 5' TTCATCAATTATAATTTTATCCTTGTTG 3'                                               |
| LBb1.3           | 5' ATTTTGCCGATTTCGGAAC 3'                                                                                                    |
|                  | <b>Real time Primers</b>                                                                                                     |
| 18S              | FP 5' TCTGCCCCGTTGCTCTGATG 3'<br>RP 5' TCACCCGTCACCACCATAG 3'                                                                |
| HB27             | FP 5' TCCTCGACTCAATCTTCAAA 3'<br>RP 5' TTCTCCGGGATTAACCTCTC 3'                                                               |
| CMV              | FP 5' ACCCTGAAACCGCCTGAAAT 3'<br>RP 5' TCCGAAGTGAACCCACACG 3'                                                                |
